# Supplementary material for: Bisphenol A Exposure during Adulthood Causes Augmentation of Follicular Atresia and Luteal Regression by Decreasing 17β-Estradiol Synthesis via Downregulation of Aromatase in Rat Ovary
Source: PubMed Central journal article supplement (PMC3672913; doi:10.1289/ehp.1205823), 2013-03-19
Supplement: ehp.1205823.s001.pdf [file ehp.1205823.s001.pdf]

## **Supplemental Material**

### **Bisphenol A Exposure during Adulthood Causes Augmentation of Follicular Atresia and Luteal Regression by Decreasing $17\beta$ -Estradiol Synthesis via Downregulation of Aromatase in Rat Ovary**

Seung Gee Lee, Ji Young Kim, Jin-Yong Chung, Yoon-Jae Kim, Ji-Eun Park, Seunghoon Oh,  
Yong-Dal Yoon, Ki Soo Yoo, Young Hyun Yoo, and Jong-Min Kim

## Table of contents

- Supplemental Material, Figure S1. Alterations in uterine cell proliferation and integrity following BPA exposure. -----1
- Supplemental Material, Figure S2. Decreases in collagen fibers in the uterus after BPA exposure. -----2
- Supplemental Material, Figure S3. Low magnification view of immunohistochemical reactivities of active caspase-3 in the ovarian section of rats exposed to BPA. -----3
- Supplemental Material, Figure S4. Alteration in CYP17A1 levels in the T-I cells of ovarian follicles after BPA exposure. -----4
- Supplemental Material, Figure S5. Effect of short-term BPA exposure on E2 serum concentration. -----5
- Supplemental Material, Figure S6. Changes in P450arom and active caspase-3 levels in granulosa cells and alterations in StAR, P450scc, and 3 $\beta$ -HSD levels in the T-I cells of ovarian follicles after short term BPA exposure. ----- 6
- Supplemental Material, Figure S7. Effects of short-term BPA exposure on serum FSH and LH levels and FSH and LH protein levels in the pituitary glands. -----7

**A**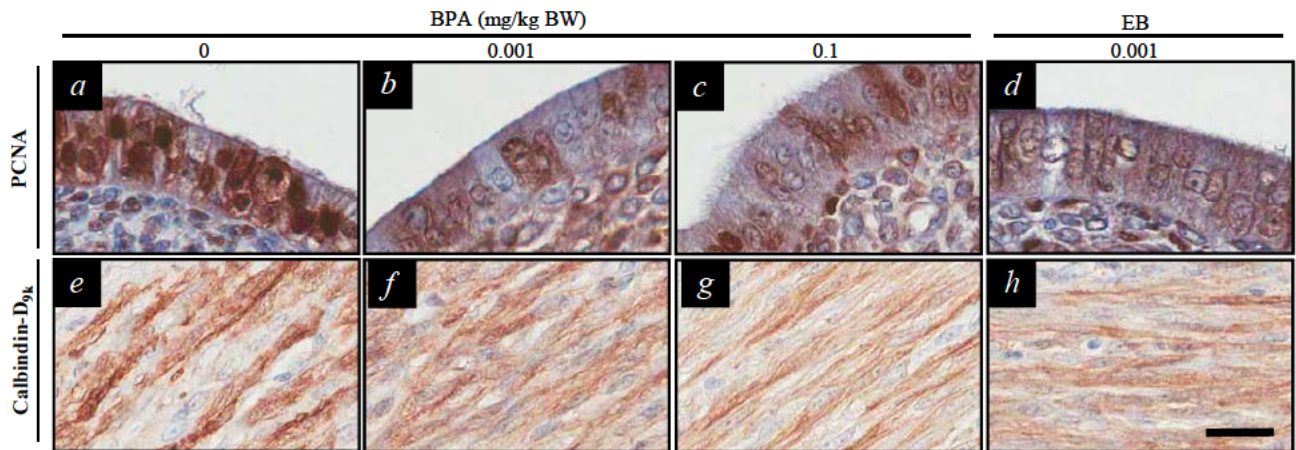**B**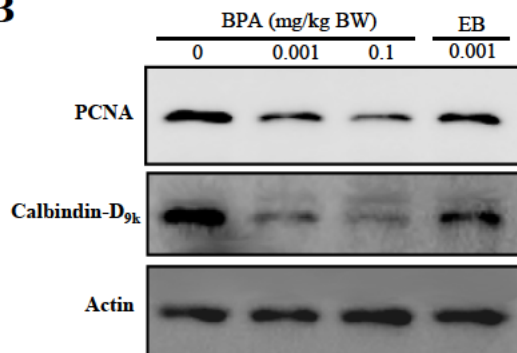**C**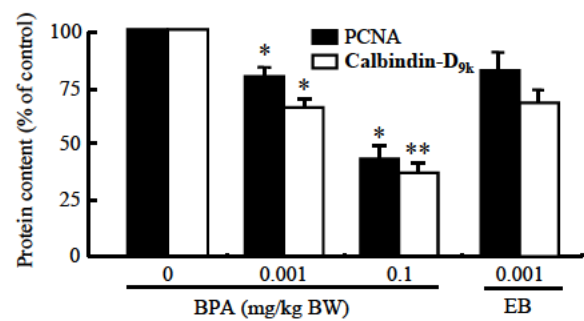

**Supplemental Material, Figure S1. Alterations in uterine cell proliferation and integrity following BPA exposure.** A: Immunohistochemical localizations of PCNA and calbindin-D<sub>9k</sub> in uterine tissues. Original magnification: 400×; bar = 30 μm. B: Western blot analysis for PCNA and calbindin-D<sub>9k</sub> in uterine tissues. C: Densitometric quantification of PCNA and calbindin-D<sub>9k</sub> protein levels in uterine tissue protein extracts. At least 3 independent experiments were performed and the data shown represents the mean ± SD. \*,  $P < 0.05$  and \*\*,  $P < 0.01$  compared with each control (0 mg/kg BW).

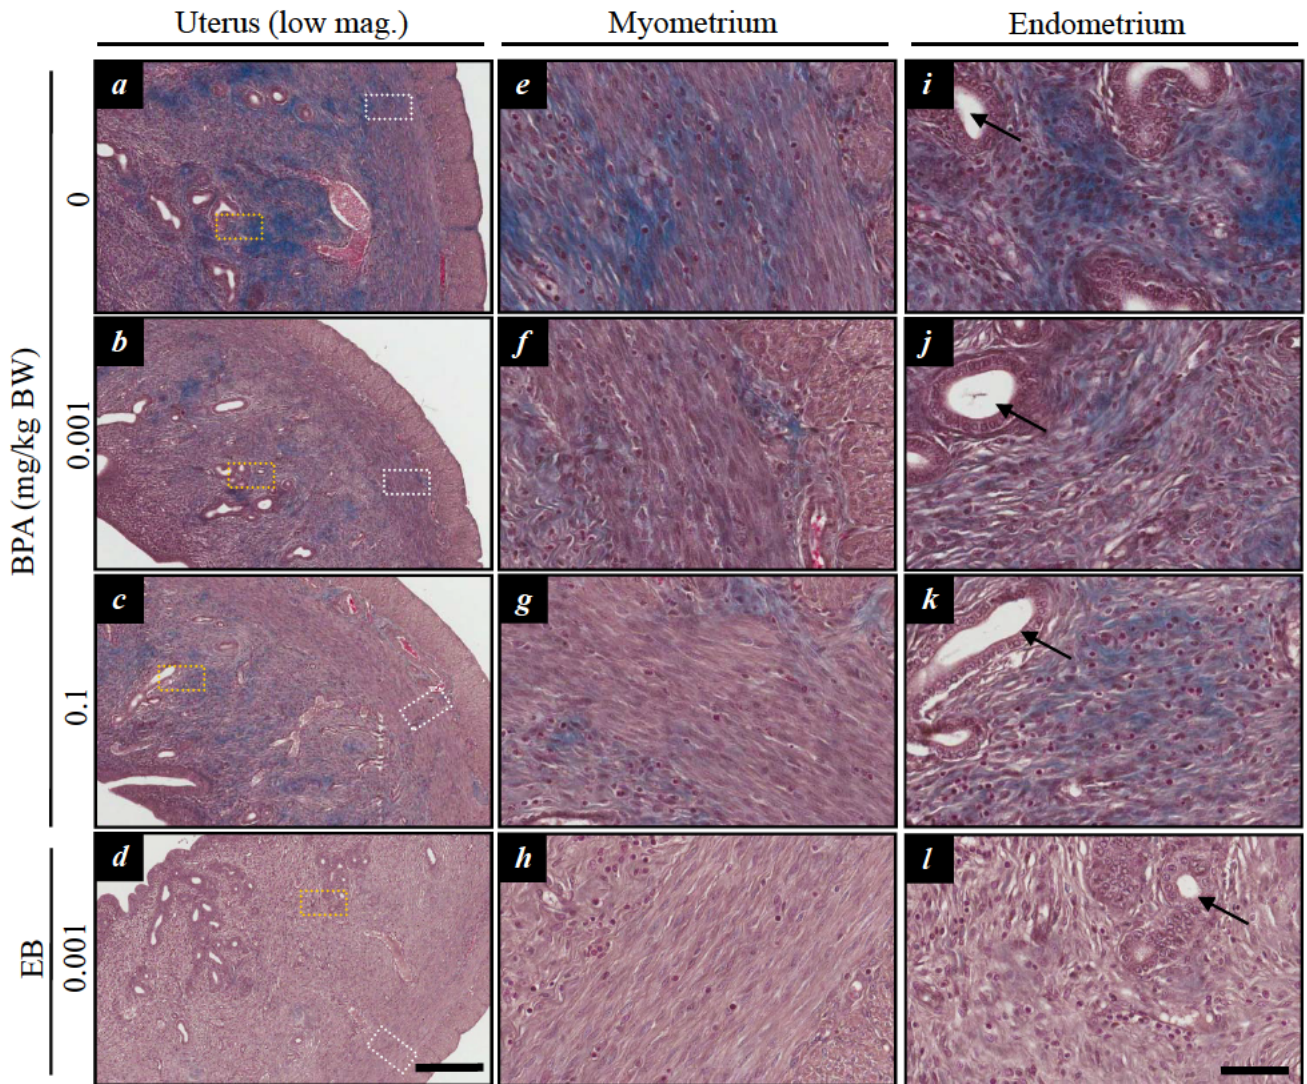

**Supplemental Material, Figure S2. Decreases in collagen fibers in the uterus after BPA exposure.** Left, center, and right columns represent whole uterine (*a-d*), myometrial (*e-h*), and endometrial (*i-l*) layers, respectively. Uterine sections were stained by the trichrome (Gomori) method. Collagen fibers are stained blue. Microphotographs of *e-h* and *i-l* are enlargements of the regions marked with yellow- and white-dotted rectangular lines in *a-d*, respectively. Arrows in *i-l* point to endometrial glands. Bars = 300  $\mu$ m (*a-d*), 60  $\mu$ m (*e-l*)

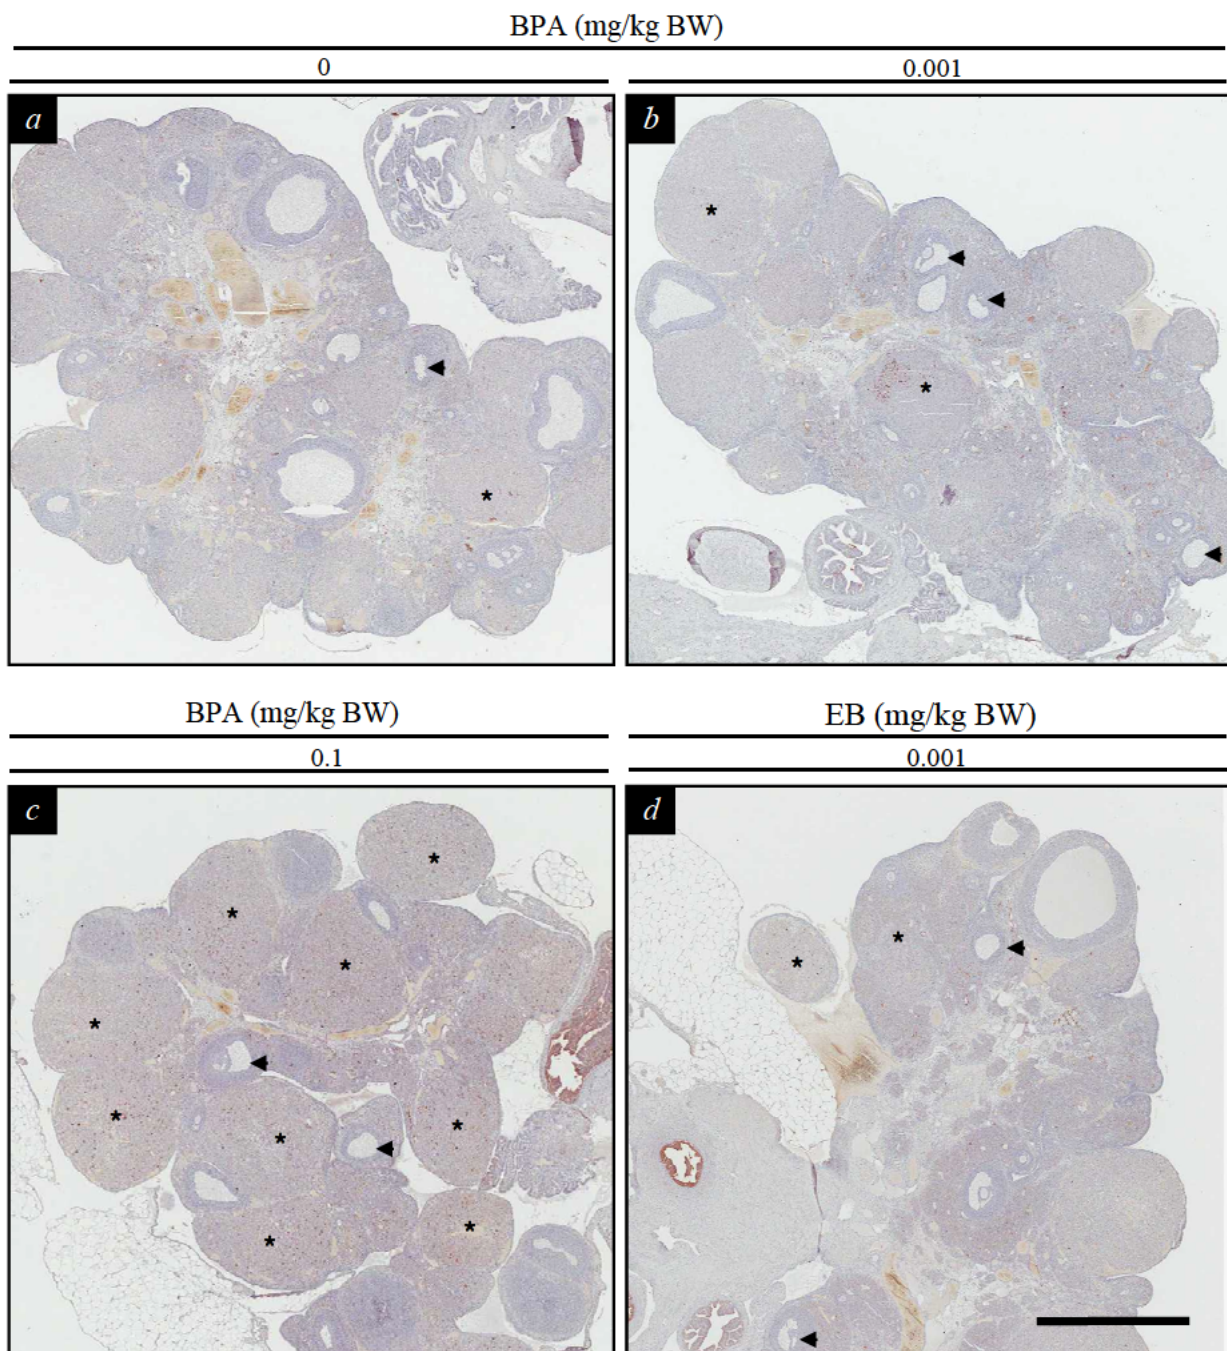

**Supplemental Material, Figure S3. Low magnification view of immunohistochemical reactivities of active caspase-3 in the ovarian section of rats exposed to BPA.** The rat ovary was fixed, embedded in paraffin, sectioned, and immunostained with the active form-specific antibody for caspase-3. The immunoreaction was visualized with the diaminobenzidine (DAB) reaction. Arrows point to atretic follicles that retained granulosa cells positively stained with caspase-3. Asterisks denote the regressing corpus luteum that retained luteal cells positively stained with caspase-3. Original magnification: 20 $\times$ ; bar = 1.2 mm.

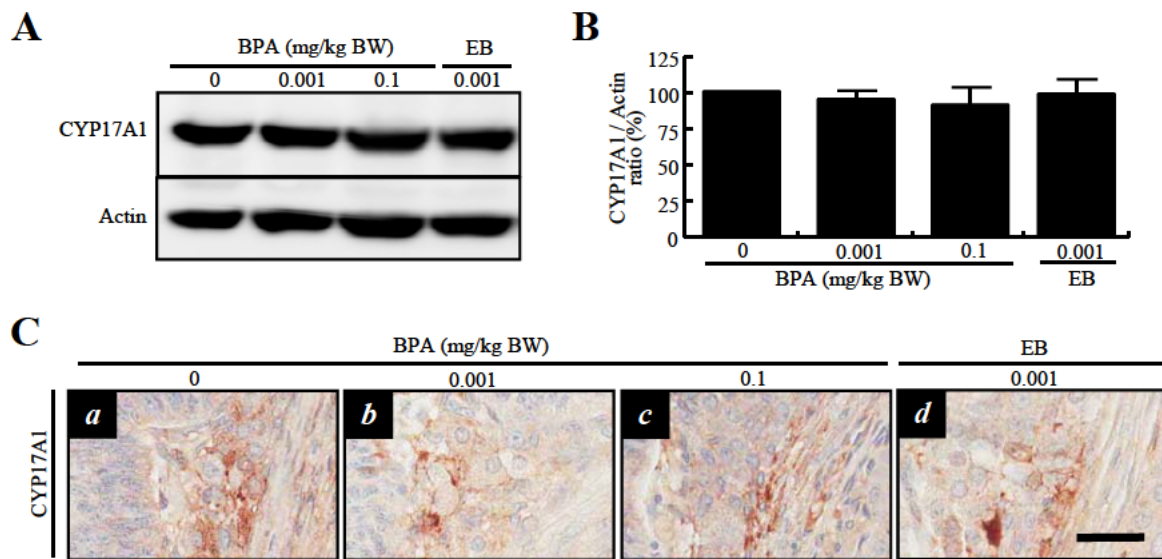

**Supplemental Material, Figure S4. Alteration in CYP17A1 levels in the T-I cells of ovarian follicles after BPA exposure.** **A:** Western blot analysis for CYP17A1 proteins. **B:** Densitometric quantification of CYP17A1 protein levels in residual ovaries. At least 3 independent experiments were performed and the data shown represent mean  $\pm$  SD values. **C:** Immunohistochemical localization of CYP17A1 in T-I layers. Original magnification: 400 $\times$ ; bar = 30  $\mu$ m.

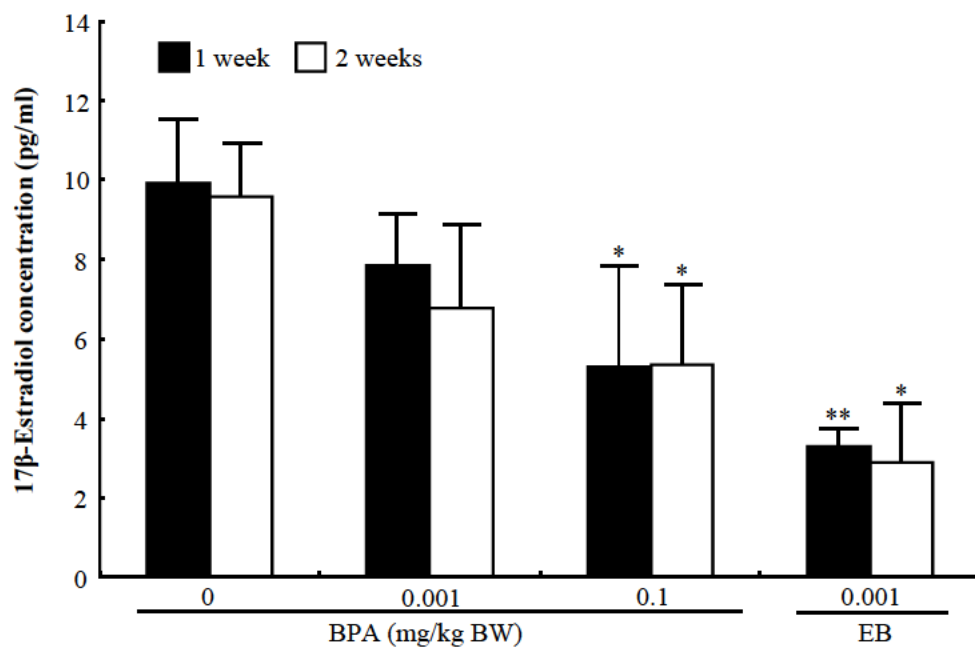

**Supplemental Material, Figure S5. Effect of short-term BPA exposure on E2 serum concentration.** Adult female rats received 0, 0.001, or 0.1 mg/kg BW per day of BPA or 0.001 mg/kg BW per day of EB for 1 or 2 weeks by gavage. E2 levels were measured by ELISA. Values represent the mean  $\pm$  SD (n = 12). \*,  $P < 0.05$  and \*\*,  $P < 0.01$  compared with the control (0 mg/kg BW).

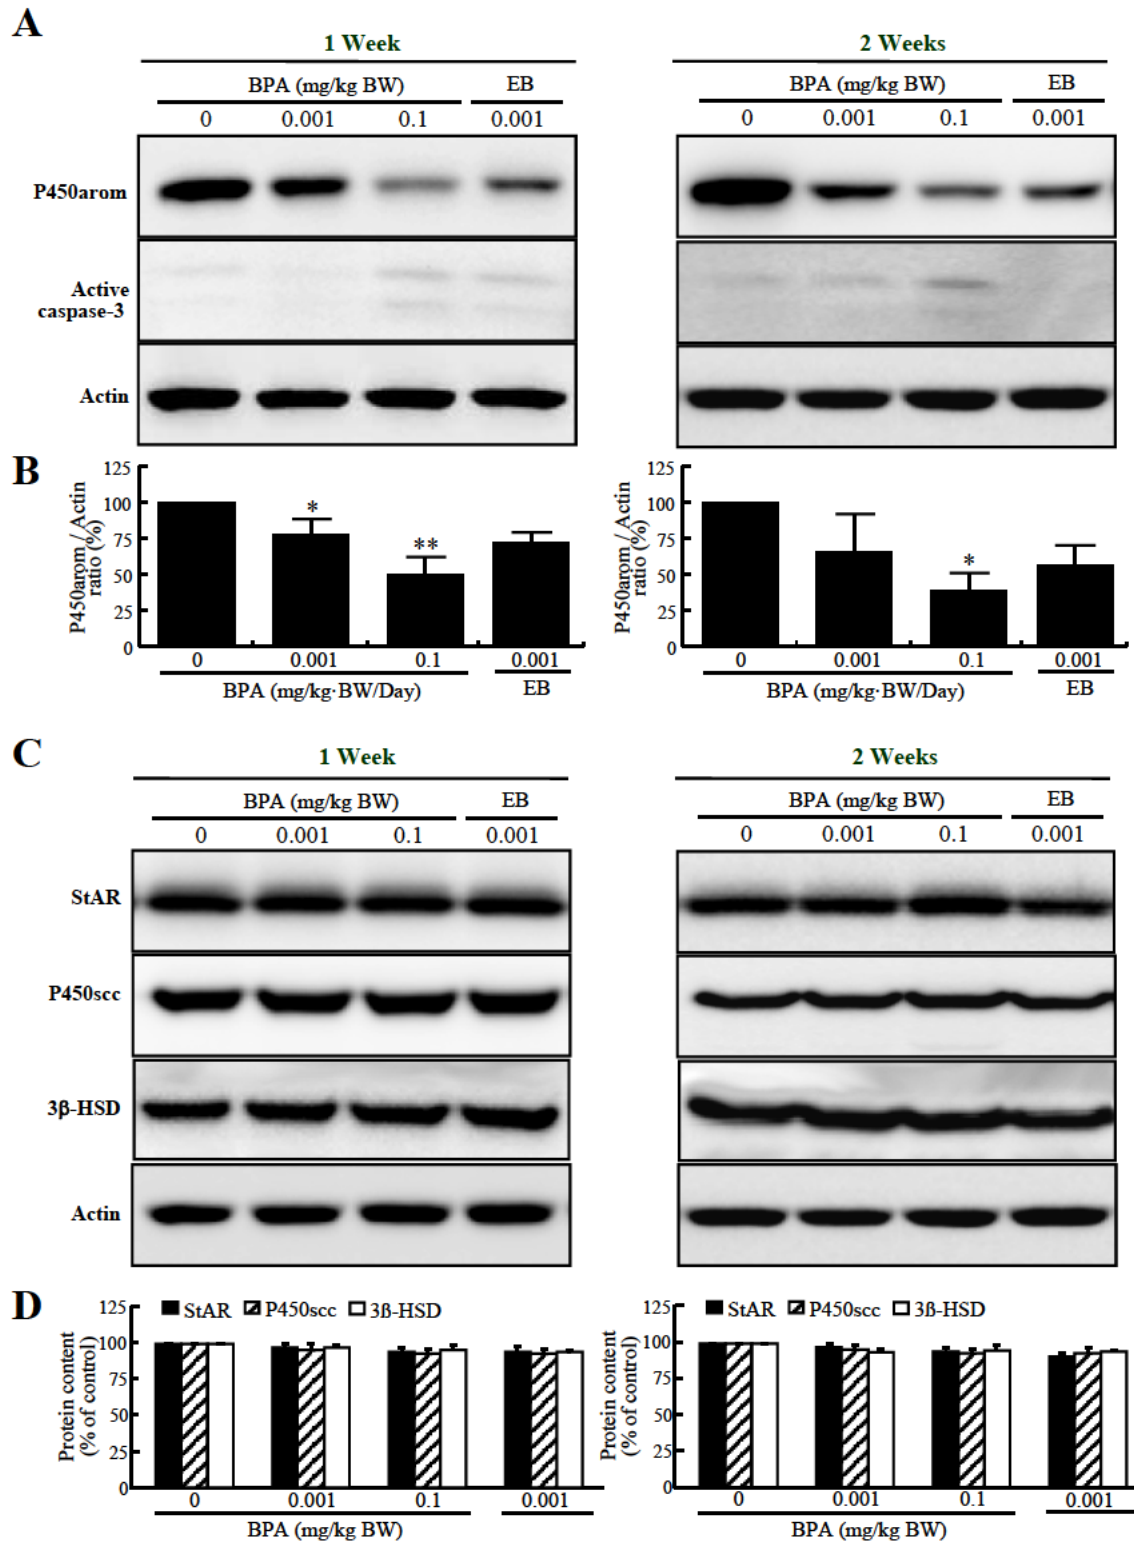

**Supplemental Material, Figure S6. Changes in P450arom and active caspase-3 levels in granulosa cells and alterations in StAR, P450scc, and 3β-HSD levels in the T-I cells of ovarian follicles after short-term BPA exposure.** **A:** Western blot analysis for P450arom and active caspase-3. **B:** Densitometric quantification of the P450arom protein levels in isolated granulosa cell protein extracts. At least 3 independent experiments were performed and the data represent mean ± SD values. \*,  $P < 0.05$  and \*\*,  $P < 0.01$  compared with each control (0 mg/kg BW). **C:** Western blot analysis for StAR, P450scc, and 3β-HSD proteins. **D:** Densitometric quantification of StAR, P450scc, and 3β-HSD protein levels in residual ovaries. At least 3 independent experiments were performed and the data shown represent mean ± SD values.



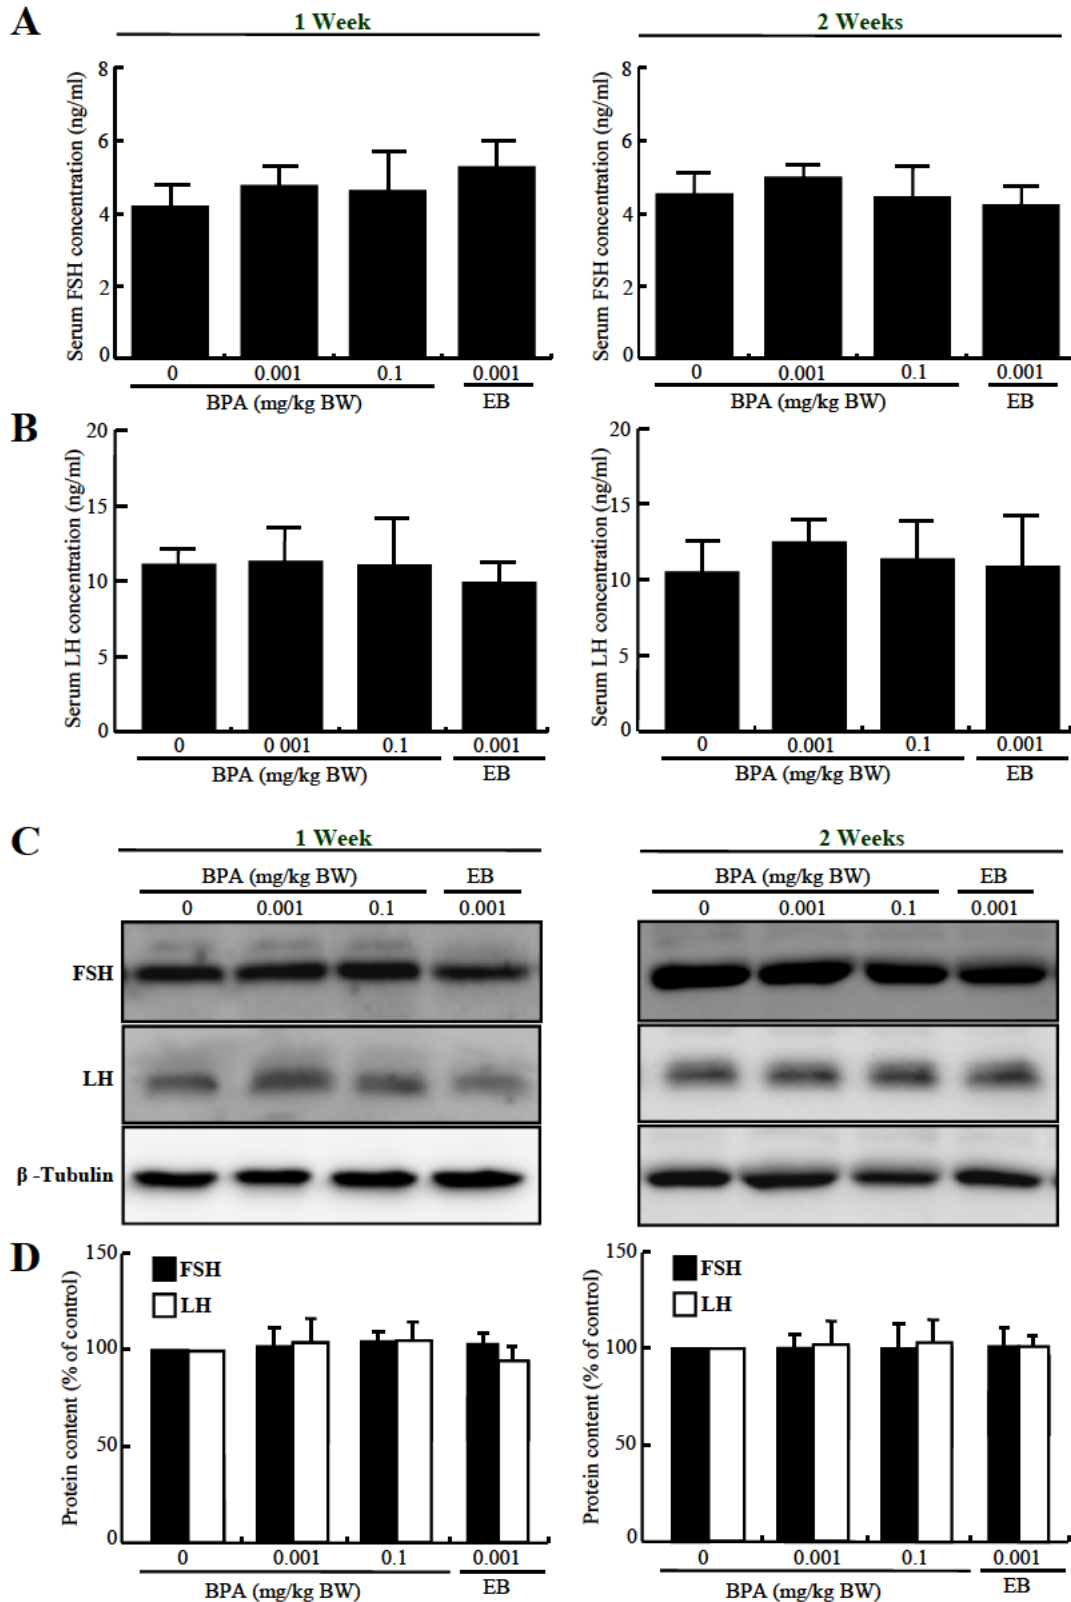

**Supplemental Material, Figure S7. Effects of short-term BPA exposure on serum FSH and LH levels and FSH and LH protein levels in the pituitary glands.** FSH (A) and LH (B) levels were measured by ELISA. Values represent the mean  $\pm$  SD ( $n = 12$ ). C: Western blot analysis of FSH and LH in pituitary gland protein extracts. D: Densitometric quantification of FSH and LH protein levels. At least 3 independent experiments were performed and the data shown represent the mean  $\pm$  SD.
